# Supplementary material
Source: publisher figshare collection journal article supplement (https://acs.figshare.com/ndownloader/files/3750706)
Supplement: Supplementary file 1 [file 3750706]

## **Supporting Information**

### **Dynamic Metabolic Modeling of Denitrifying Bacterial Growth: The Cybernetic Approach**

Hyun-Seob Song<sup>\*</sup> and Chongxuan Liu

Pacific Northwest National Laboratory

Richland, WA 99352, USA

<sup>\*</sup>To whom correspondence should be addressed:

Phone: +1-509-375-4485

Fax: +1-509-371-6946

E-Mail: [hyunseob.song@pnnl.gov](mailto:hyunseob.song@pnnl.gov)

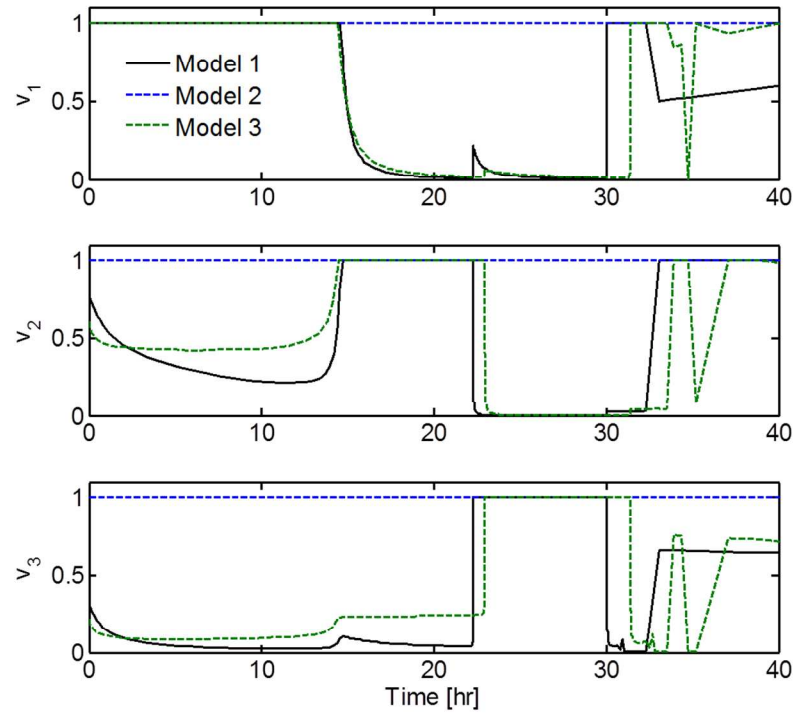

**Figure S1.** Trajectories of the cybernetic variables  $v_1$ ,  $v_2$ , and  $v_3$  in Models 1, 2 and 3 defined in Table 2, respectively.

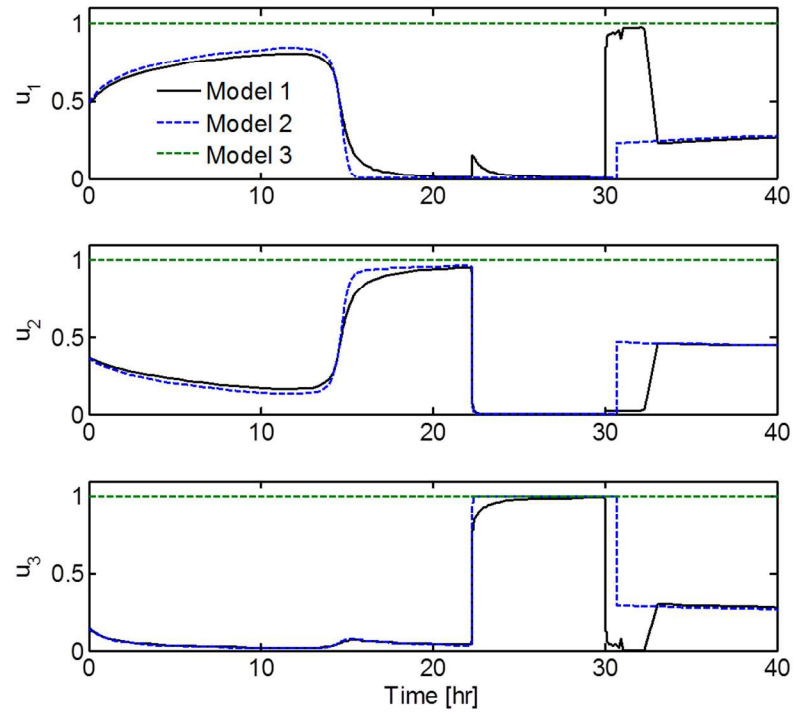

**Figure S2.** Trajectories of the cybernetic variables  $u_1$ ,  $u_2$ , and  $u_3$  in Models 1, 2 and 3 defined in Table 2, respectively.

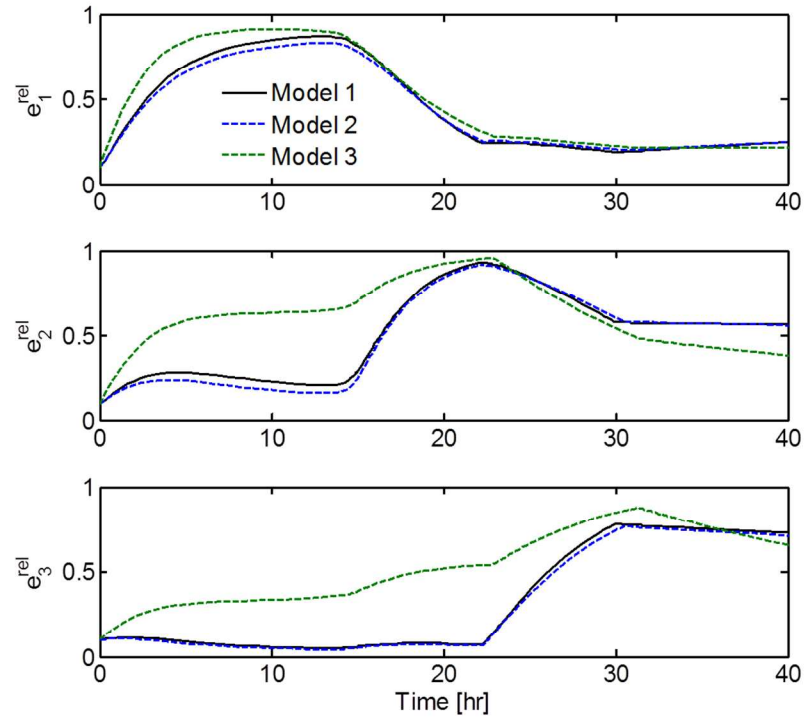

**Figure S3.** Trajectories of relative enzyme levels  $e_1^{rel}$ ,  $e_2^{rel}$ , and  $e_3^{rel}$  in Models 1, 2 and 3 defined in Table 2, respectively.
